# Supplementary material
Source: PubMed Central journal article supplement (PMC1948873)
Supplement: NIHMS18381-supplement-AppS2.pdf [file NIHMS18381-supplement-AppS2.pdf]

## 1 **Appendix S2: Derivation of statistical analysis**

2  
3 In the model presented here we assumed that all dispersing female bugs dispersed  
4 independently of each other and arrived at and established new colonies at other sites  
5 with equal probability. We found no evidence contrary to this assumption in preliminary  
6 analysis. We assumed either a high or a low probability of a bug finding other sites,  
7 leading to two different scenarios with different link functions and error variances. Since  
8 both regression models yielded the same best model we present here only one.

9 According to this regression model, the probability per bug of arrival at any site  
10 was low, making the pool of dispersers much larger than the total number of bugs  
11 arriving at any site. Since the effect of bugs arriving at individual sites on the overall pool  
12 of dispersers is negligible in this scenario, arrival events on different sites are  
13 approximately independent. Furthermore the combination of a large number of dispersers  
14 and a low arrival probability leads to a Poisson distribution of arrival events per site  
15 (Pitman 1997) with parameter  $\lambda = Nr$ , where  $N$  is the number of dispersers and  $r$  is the  
16 arrival probability of a disperser on an individual site. Denoting by  $q$  the conditional  
17 probability of establishment, given arrival, the overall probability of establishment per  
18 site becomes:

$$19 \quad p = 1 - \sum_{k=0}^{\infty} (1-q)^k \frac{\lambda^k e^{-\lambda}}{k!} = 1 - \frac{e^{-\lambda}}{e^{-\lambda(1-q)}} = 1 - e^{-Nqr} .$$

20 The exponent,  $-N*q*r$ , was estimated by  $a + b*x$ , where  $x$  indicates the number of  
21 bugs found on source sites, leading to the regression equation in the text.

22 We obtained the maximum likelihood parameter values using iterative weighted  
23 least square regressions (McCullagh & Nelder 1989). Our estimation procedure stopped

24 after 30 iterations or when all parameter estimates changed between two iterations by less  
25 than 0.1%. We recorded for each model whether or not parameter estimates converged. In  
26 rare occasions models yielded an estimate of  $p$  below zero; in these cases the estimate  
27 was replaced by  $10^{-4}$ .

28

### 29 *Classifying a site as infested or uninfested*

30 The survey team did not always survey all existing sites but rather excluded sites  
31 it believed to be empty based on extensive prior experience. We carried out two full  
32 analyses of the data. In one analysis, reported here, we treated unsurveyed sites as  
33 uninfested, as the survey team assumed. In a second, separate analysis, not reported here,  
34 we did not assume that unsurveyed sites were uninfested and calculated the explanatory  
35 variable as proportion of surveyed sites. That analysis yielded in general similar results  
36 but overall a worse model fit, and was therefore considered less informative.

37 We estimated a separate model based on the assumption that all observed  
38 establishment events were a result of misclassifying each season a certain proportion of  
39 truly infested sites as uninfested. This model yielded a much worse fit than the models  
40 discussed here and is therefore not presented.

41

### 42 *Explanatory variable: source of dispersers*

43 The regression model was calculated separately for all combinations of the two  
44 alternative response variables described above and 36 alternative explanatory variables.  
45 These  $36 = 9 \times 2 \times 2$  alternatives emerged as follows. We had nine alternative ways of  
46 determining source sites at  $t$  (9 alternatives). For each alternative we either summed the

47 number of source sites or the number of bugs on source sites at  $t$  (2 alternatives). We  
48 calculated these sums either separately for each ecotype or for all source sites together (2  
49 alternatives). All alternatives for calculating the explanatory variable are listed in Table 1.  
50 The nine alternatives to determine which sites infested at  $t$  could be source sites at  $t$  arose  
51 because the infestation status of a site at each “adjacent” survey,  $t+1$  and  $t-1$ , could  
52 influence the site’s status as source site at  $t$  in three different ways.

53         The infestation status of a site at survey  $t-1$  could affect its contribution to  
54 establishment between  $t$  and  $t+1$  if there was a time lag between a site receiving and  
55 emitting dispersers such that only sites which were infested at  $t$  and  $t-1$  emitted dispersers  
56 between  $t$  and  $t+1$ . Such a time lag could arise in two ways: (i) if only adults dispersed to  
57 other sites, it would take a complete bug life cycle between the time when a site received  
58 dispersers (i.e. received adults from a different site) and produced its own adult  
59 dispersers; (ii) due to local population dynamics, sites could undergo a time lag between  
60 receiving dispersers and reaching a density at which bugs dispersed to other sites.

61         The average time from egg to adult is 161 days (Rabinovich 1972) in optimal  
62 laboratory conditions at 27°C and is roughly similar to the time (183 days) between two  
63 surveys. If only adults dispersed and the life cycle was somewhat longer in nature, one  
64 would not expect sites that were uninfested at  $t-1$  and had no nymphs present at  $t$  to  
65 produce dispersers before  $t+1$ . Hence as a first possibility we defined source sites as sites  
66 which were infested at  $t$  and were either infested at  $t-1$  as well or uninfested at  $t-1$  but had  
67 nymphs present at  $t$  (Table 1, alternative Ia).

68         In closed experimental chicken huts, the bug densities of huts initially stocked  
69 with five female and three male *T. infestans* continued to increase over two years

70 (Cecere, Canale & Gürtler 2003), suggesting the possibility of a time lag due to local  
71 population dynamics. To describe such a time lag, our second definition of source sites at  
72 survey  $t$  included all sites which were infested at surveys  $t$  and  $t-1$  (Table 1 alternative I  
73 b). The third definition of source sites was simply all infested sites at survey  $t$ , describing  
74 a situation without time lag (Table 1, alternative I c). As mentioned above, we analyzed  
75 the nine half-year intervals between surveys starting November 1994. We used the results  
76 from the survey in October 1993 to approximate infestation at  $t-1$  for the survey in  
77 November 1994.

78         The fate of an infested site (persistence or extinction of its bug population)  
79 between survey  $t$  and  $t+1$  could also influence to what degree it contributed to new  
80 establishment events in that time interval. If dispersal was concentrated at the beginning  
81 of the intervals between the surveys (shortly after each survey  $t$ ), most infested sites  
82 infested at  $t$  contributed to new establishment events regardless of whether or not they  
83 went extinct before survey  $t+1$ . Conversely, if dispersal happened mainly towards the end  
84 of the intervals (shortly before each survey  $t+1$ ), only sites that did not go extinct before  
85 survey  $t+1$  were likely to contribute to new establishment events. If establishment was  
86 constant throughout the time intervals between surveys, the contribution of an infested  
87 site to new infestations was proportional to the time it was infested during a time interval.

88         Since we had no a priori knowledge about the timing of establishment, we  
89 compared the fit produced by three alternative ways to determine source sites at  $t$ . The  
90 first two methods were to either include *all* sites that were infested at survey  $t$  (Table 1,  
91 alternative II a) or only sites that were infested at survey  $t$  and  $t+1$  (Table 1, alternative II

92 b), corresponding to establishment at the beginning or the end of the time interval,  
93 respectively.

94         The source sites for the second alternative (Table 1, alternative II b) could include  
95 some sites that went extinct and experienced new establishment between  $t$  and  $t+1$ .  
96 Increased establishment that was independent of the level of infestation could therefore  
97 increase the number of sites we classified as source sites and the number of establishment  
98 events thus inducing a positive correlation between the response and explanatory  
99 variables. A comparison of the fit produced by model alternative II b (Table 1) with other  
100 alternatives therefore cannot prove but can only disprove dispersal at the end of the time  
101 intervals.

102         The third alternative we considered was continuous dispersal (Table 1, alternative  
103 II c). To describe this process, we had to determine the time of extinction between the  
104 surveys  $t$  and  $t+1$ . We were able to estimate the time of extinction only for infested sites  
105 sprayed between  $t$  and  $t+1$  since spraying dates were known and extinction was likely  
106 immediately to follow insecticide spraying. Extinction dates of unsprayed infested sites  
107 were unknown. We therefore multiplied each site that was infested at survey  $t$  and  
108 sprayed between survey  $t$  and  $t+1$  by the ratio of time between survey  $t$  and the spraying  
109 date over the time interval between survey  $t$  and  $t+1$ . Unsprayed sites that were infested  
110 at survey  $t$  were multiplied by 0.5 if they were uninfested at  $t+1$  and by 1 if they were  
111 infested at  $t+1$ .

112         In summary, for a site infested at time  $t$ , infestation at each of the two surveys  $t-1$   
113 and  $t+1$  could influence the potential of the site to act as source of establishment between  
114  $t$  and  $t+1$  in the three alternative ways. The three ways of treating time lags, described

115 above, combined with these three ways infestation could influence establishment, led to  
116 nine ways of determining source sites at  $t$ .

117         The methods so far determined which of the sites infested at  $t$  was a source site  
118 between  $t$  and  $t+1$ . Depending on whether the number of infested sites or the number of  
119 bugs from these sites was a better predictor of the number of dispersers, one could either  
120 sum these weights directly (Table 1, alternative III a) or sum the product of each weight  
121 with the number of bugs found at the respective site and survey (Table 1, alternative III  
122 b).

123         The number of bugs seemed the more natural predictor, but if the number of bugs  
124 found at a site was an unreliable indicator of population size at a site or if the fraction of  
125 the population dispersing decreased with population size, as shown by McEwen, Lehane  
126 & Whitaker (1993), the number of sites could predict better. We used both alternatives in  
127 combination with all nine ways of determining a source site, obtaining 18 ways of  
128 calculating the explanatory variable.

129         Finally we investigated whether sites belonging to different ecotypes acted  
130 differently as source sites. Similar to the methods of Ceballos et al. (2005), we grouped  
131 sites into corrals, chicken-associated sites and domestic sites. Even though other studies  
132 found evidence for differences between goat and pig corrals (Cecere et al. 2004; Ceballos  
133 et al. 2005), we omitted this distinction to reduce the number of parameters to be  
134 estimated. We then calculated the explanatory variable either for all sites together (Table  
135 1, alternative IV a), or for chicken associated sites and corrals separately (Table 1,  
136 alternative IV b).

137

138 *Categorical variables*

139           For each regression model we explored the effect of the categorical variables  
140 "season," "village location" and "ecotype of target sites." A hypothesis-testing approach  
141 to multiple categorical variables in regression poses a problem of multiple comparisons  
142 (Burnham & Anderson 2002, page 129ff). We therefore used the  $AIC_c$  to compare the fit  
143 produced by a single regression line with the fit obtained by estimating a separate  
144 regression line per factor level of the categorical variable. We did this comparison for all  
145 combinations of factor levels of all categorical variables. Since we had three dichotomous  
146 categorical variables, we had eight ( $2^3$ ) alternative model structures to compare.

147           The variables "season" and "village location" were structured as follows. There  
148 were ten observations for the intervals from November to May and the eight from May to  
149 November. The two village locations (Amamá and Mercedes-Trinidad) each had all of  
150 these seasonal observations.

151           An effect of both "season" and "village location" could be expected a priori. Bug  
152 activity strongly fluctuates seasonally in the study region: bugs are much less active in  
153 the winter (Cohen & Gürtler 2001; Gorla & Schofield 1989). The two village locations  
154 differ in vegetation density. The third categorical variable was created by distinguishing  
155 three types of target sites (including domestic sites as a distinct type), thereby tripling the  
156 number of observations when we distinguished among ecotypes.

157           As mentioned above, for domestic sites only sensor box data (rather than flushing  
158 out data) were collected at half-year intervals. We included sensor box data from  
159 domestic sites as an additional response variable when we tested for ecotype differences  
160 in target sites but otherwise used the analysis of flushing out observations from

161 peridomiciliary sites only. Again we compared the  $AIC_c$  of the model with three  
162 regression lines against  $AIC_c$  of the single-line-model and combined this comparison with  
163 all the comparisons mentioned above.

164 The number of parameters became too large when three factor level distinctions  
165 were combined with two explanatory variables. We therefore combined models that fitted  
166 two explanatory variables only with each categorical variable by itself or the combination  
167 of season or village location with target site ecotype since the distinction among target  
168 site ecotypes is nested within all other covariates. We therefore compared 504 alternative  
169 models altogether (all combinations of two response variables, 18 single explanatory  
170 variables and eight factor level combinations plus all combinations of two response  
171 variables, 18 double explanatory variables and six factor level combinations).

172

173 **References:**

174

175 Burnham, K.P. & Anderson, D.R. (2002) *Model selection and multimodel inference. A*  
176 *practical information theoretic approach*. Springer-Verlag, New York.

177

178 Ceballos, L.A., Vazquez-Prokopec, G.M., Cecere, M.C., Marcet, P.L. & Gürtler, R.E.  
179 (2005) Feeding rates, nutritional status and flight dispersal potential of peridomestic  
180 populations of *Triatoma infestans* in rural northwestern Argentina. *Acta Tropica*, **95**, 149-  
181 159.

182



183 Cecere, M.C., Canale, D.M. & Gürtler R.E. (2003) Effects of refuge availability on the  
184 population dynamics of *Triatoma infestans* in central Argentina. *Journal of Applied*  
185 *Ecology*, **40**, 742-756.

186

187 Cecere, M.C., Vazquez-Prokopec, D.G.M., Gürtler, R.E. & Kitron, U. (2004) Spatio-  
188 temporal analysis of reinfestation by *Triatoma infestans* (Hemiptera: Reduviidae)  
189 following insecticide spraying in a rural community in Northwestern Argentina.  
190 *American Journal of Tropical Medicine and Hygiene*, **71**, 803-810.

191

192 Cohen, J.E. & Gürtler, R.E. (2001) Modeling household transmission of American  
193 Trypanosomiasis. *Science*, **293**, 694-698.

194

195 Gorla, D.E. & Schofield, C.J. (1989) Population dynamics of *Triatoma infestans* under  
196 natural climatic conditions in the Argentine Chaco. *Medical and Veterinary Entomology*,  
197 **3**, 179-194.

198

199 McCullagh, P. & Nelder, J.A. (1989) *Generalized linear models*. Chapman and Hall,  
200 London.

201

202 McEwen, P.K., Lehane, M.J. & Whitaker, C.J. (1993) The effect of adult population  
203 density on flight initiation in *Triatoma infestans* (Klug) (Hem. Reduviidae). *Journal of*  
204 *Applied Entomology*, **116**, 321-325.

205

206 Pitman, J. (1997) *Probability*. Springer Verlag, New York.

207

208 Rabinovich, J.E. (1972) Vital statistics of Triatominae (Hemiptera: Reduviidae) under

209 laboratory conditions I. *Triatoma infestans* Klug. *Journal of Medical Entomology*, **9**, 331-

210 370.
