# Supplementary material
Source: PubMed Central journal article supplement (PMC1948873)

**Figure S1:** Number of establishment events between  $t-1$  and  $t$  (A) and number of infested sites at  $t$  (B), plotted against survey  $t$ . Observed (open symbols) and predicted (filled symbols) number of sites are shown for Amamá (circles) and Mercedes-Trinidad (triangles). Error bars indicate standard errors for the binomial model.

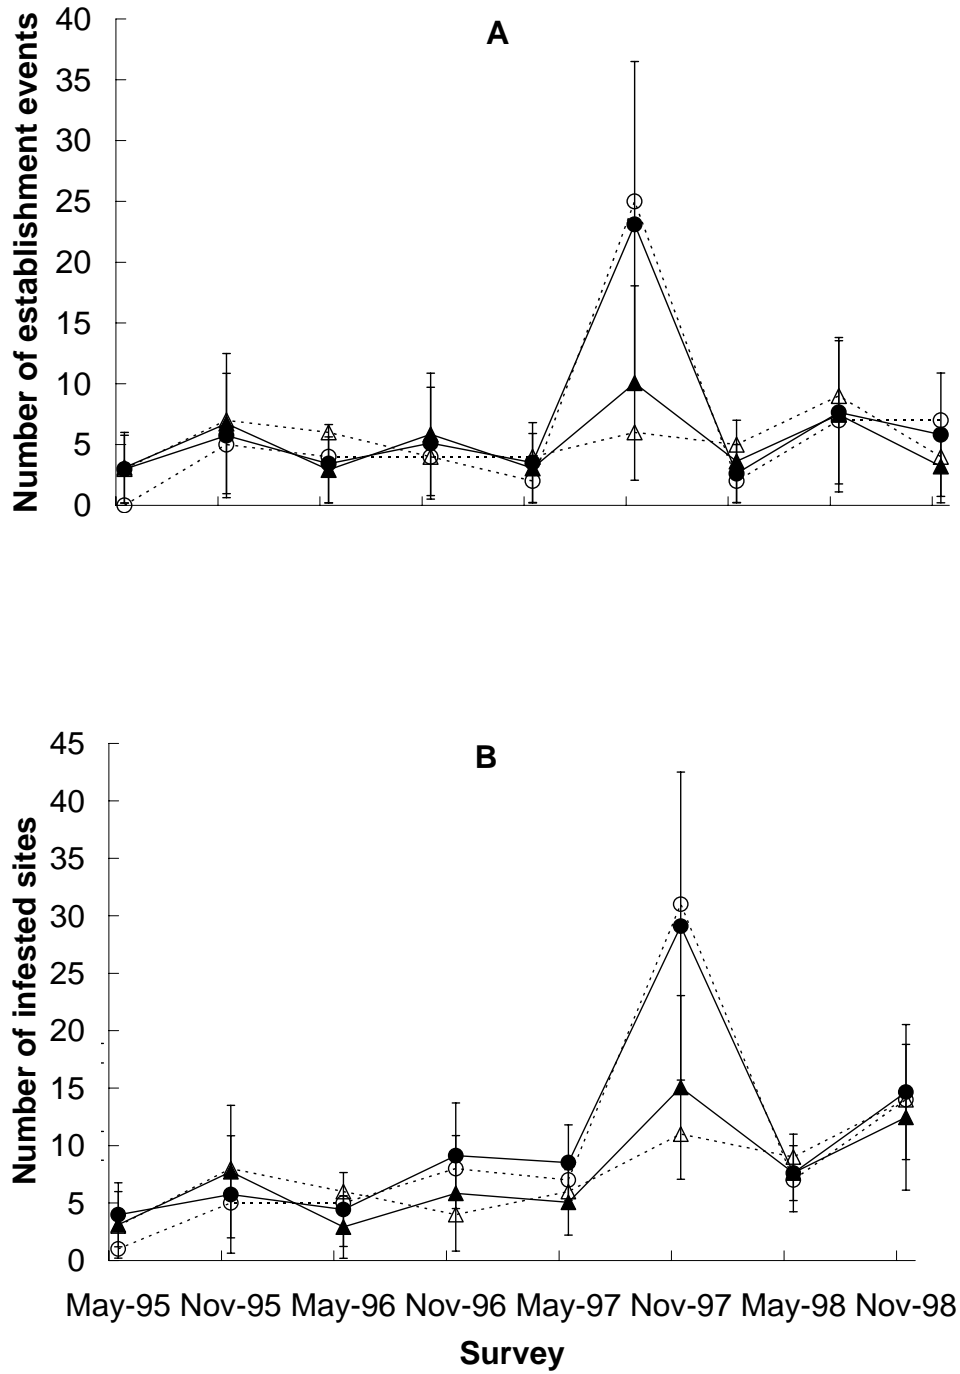

Supplement: NIHMS18381-supplement-FigsS1.pdf [file NIHMS18381-supplement-FigsS1.pdf]
