# Supplementary material
Source: PubMed Central journal article supplement (PMC1948873)
Supplement: NIHMS18381-supplement-TableS1.pdf [file NIHMS18381-supplement-TableS1.pdf]

**Table S1: Data table**

| Survey | Mean no. of bugs per inf. site (flushing out of peri-domestic sites only) |      | No. of infested sites (flushing out of peri-domestic sites only) |     | Values of explanatory variable for best model of 6-month intervals |      | Values of explanatory variable for best model of 12-month intervals |     | Number of estimated establishment events in 6 months |      | Proportion of uninfested sites becoming infested in 6 months |      | Number of estimated establishment events in 12 months |      |
|--------|---------------------------------------------------------------------------|------|------------------------------------------------------------------|-----|--------------------------------------------------------------------|------|---------------------------------------------------------------------|-----|------------------------------------------------------|------|--------------------------------------------------------------|------|-------------------------------------------------------|------|
|        | Am.                                                                       | M/T  | Am.                                                              | M/T | Am.                                                                | M/T  | Am.                                                                 | M/T | Am.                                                  | M/T  | Am.                                                          | M/T  | Am.                                                   | M/T  |
| Oct-93 | 2.7                                                                       | 1    | 3                                                                | 4   | -                                                                  | -    | -                                                                   | -   | -                                                    | -    | -                                                            | -    | -                                                     | -    |
| Nov-94 | 1                                                                         | 5    | 2                                                                | 2   | 0                                                                  | 0    | -                                                                   | -   | 0                                                    | 3.4  | 0                                                            | 0.07 | -                                                     | -    |
| May-95 | 2                                                                         | 1    | 1                                                                | 3   | 1.0                                                                | 0    | 0.5                                                                 | 0   | 5.2                                                  | 7.7  | 0.10                                                         | 0.15 | 5.5                                                   | 9.0  |
| Nov-95 | 2.8                                                                       | 4.8  | 5                                                                | 8   | 0                                                                  | 1.0  | 0.5                                                                 | 0.1 | 4.3                                                  | 7.3  | 0.08                                                         | 0.14 | 4.4                                                   | 8.4  |
| May-96 | 3.4                                                                       | 3.7  | 5                                                                | 6   | 0                                                                  | 0    | 0                                                                   | 0.1 | 4.6                                                  | 5.2  | 0.08                                                         | 0.10 | 7.5                                                   | 5.8  |
| Nov-96 | 3.3                                                                       | 2.8  | 8                                                                | 4   | 5.8                                                                | 0    | 1.6                                                                 | 0   | 2.3                                                  | 4.9  | 0.04                                                         | 0.09 | 4.1                                                   | 6.1  |
| May-97 | 8.7                                                                       | 6.2  | 7                                                                | 6   | 48.0                                                               | 0.5  | 4.6                                                                 | 0.5 | 29.1                                                 | 7.1  | 0.46                                                         | 0.12 | 30.7                                                  | 11.3 |
| Nov-97 | 7.4                                                                       | 11.2 | 31                                                               | 11  | 20.1                                                               | 46.8 | 4.6                                                                 | 3.2 | 3.9                                                  | 6.0  | 0.07                                                         | 0.09 | 13.6                                                  | 8.0  |
| May-98 | 6.4                                                                       | 5.4  | 7                                                                | 9   | 17.1                                                               | 16.5 | 4.8                                                                 | 5.2 | 13.4                                                 | 11.5 | 0.21                                                         | 0.18 | 27.0                                                  | 13.7 |
| Nov-98 | 8.4                                                                       | 3.4  | 14                                                               | 14  | 65.5                                                               | 21.5 | 6.6                                                                 | 7.0 | 9.6                                                  | 5.6  | 0.15                                                         | 0.09 | 14.7                                                  | 13.1 |
| May-99 | 7.9                                                                       | 4.7  | 15                                                               | 15  | -                                                                  | -    | -                                                                   | -   | -                                                    | -    | -                                                            | -    | -                                                     | -    |

Key to abbreviations

no. = number

inf. = infested

Am. = Amamá

M/T = Mercedes-Trinidad
